# Supplementary material for: From market access to patient access: overview of evidence-based approaches for the reimbursement and pricing of pharmaceuticals in 36 European countries
Source: PubMed Central journal article supplement (PMC4583728; doi:10.1186/s12961-015-0028-5), 2015-09-25
Supplement: 12961_2015_28_MOESM2_ESM.pdf [file 12961_2015_28_MOESM2_ESM.pdf]

## Medline (Pubmed), date of search 2012-04-12

|     |                                                                                                                                                                                                                                                                                                                                        |        |
|-----|----------------------------------------------------------------------------------------------------------------------------------------------------------------------------------------------------------------------------------------------------------------------------------------------------------------------------------------|--------|
| #1  | Search (((((((pharmaceuticals[TIAB])) OR (drugs[TIAB])) OR (medicines[TIAB])) OR ("Pharmaceutical Preparations"[Mesh]))) AND (((((((reimbursement[TIAB])) OR (pricing[TIAB])) OR ("Insurance Coverage"[Mesh])) OR ("Costs and Cost Analysis"[Mesh])) OR ("Insurance, Health, Reimbursement"[Mesh])) OR ("Insurance Benefits"[Mesh])))) | 12231  |
| #2  | Search portugal[TIAB]                                                                                                                                                                                                                                                                                                                  | 5092   |
| #3  | Search portuguese[TIAB]                                                                                                                                                                                                                                                                                                                | 4747   |
| #4  | Search "Portugal"[Mesh]                                                                                                                                                                                                                                                                                                                | 6073   |
| #5  | Search ((#2) OR #3) OR #4                                                                                                                                                                                                                                                                                                              | 10897  |
| #6  | Search (#5) AND #1                                                                                                                                                                                                                                                                                                                     | 20     |
| #7  | Select 20 document(s)                                                                                                                                                                                                                                                                                                                  | 20     |
| #8  | Search romania*[TIAB]                                                                                                                                                                                                                                                                                                                  | 3201   |
| #9  | Search "Romania"[Mesh]                                                                                                                                                                                                                                                                                                                 | 7354   |
| #10 | Search (#8) OR #9                                                                                                                                                                                                                                                                                                                      | 8572   |
| #11 | Search (#10) AND #1                                                                                                                                                                                                                                                                                                                    | 7      |
| #12 | Select 7 document(s)                                                                                                                                                                                                                                                                                                                   | 7      |
| #13 | Search slovakia*[TIAB]                                                                                                                                                                                                                                                                                                                 | 2264   |
| #14 | Search "Slovakia"[Mesh]                                                                                                                                                                                                                                                                                                                | 1486   |
| #15 | Search (#13) OR #14                                                                                                                                                                                                                                                                                                                    | 2948   |
| #16 | Search (#15) AND #1                                                                                                                                                                                                                                                                                                                    | 14     |
| #17 | Select 14 document(s)                                                                                                                                                                                                                                                                                                                  | 14     |
| #18 | Search slovenia*[TIAB]                                                                                                                                                                                                                                                                                                                 | 2018   |
| #19 | Search "Slovenia"[Mesh]                                                                                                                                                                                                                                                                                                                | 1382   |
| #20 | Search (#18) OR #19                                                                                                                                                                                                                                                                                                                    | 2397   |
| #21 | Search (#20) AND #1                                                                                                                                                                                                                                                                                                                    | 9      |
| #22 | Select 9 document(s)                                                                                                                                                                                                                                                                                                                   | 9      |
| #23 | Search spain[TIAB]                                                                                                                                                                                                                                                                                                                     | 28464  |
| #24 | Search spanish[TIAB]                                                                                                                                                                                                                                                                                                                   | 22133  |
| #25 | Search "Spain"[Mesh]                                                                                                                                                                                                                                                                                                                   | 45852  |
| #26 | Search ((#23) OR #24) OR #25                                                                                                                                                                                                                                                                                                           | 68316  |
| #27 | Search (#26) AND #1                                                                                                                                                                                                                                                                                                                    | 265    |
| #28 | Select 265 document(s)                                                                                                                                                                                                                                                                                                                 | 265    |
| #29 | Search sweden[TIAB]                                                                                                                                                                                                                                                                                                                    | 27124  |
| #30 | Search swedish[TIAB]                                                                                                                                                                                                                                                                                                                   | 22201  |
| #31 | Search "Sweden"[Mesh]                                                                                                                                                                                                                                                                                                                  | 51637  |
| #32 | Search ((#29) OR #30) OR #31                                                                                                                                                                                                                                                                                                           | 70457  |
| #33 | Search (#32) AND #1                                                                                                                                                                                                                                                                                                                    | 284    |
| #34 | Select 284 document(s)                                                                                                                                                                                                                                                                                                                 | 284    |
| #35 | Search united kingdom[TIAB]                                                                                                                                                                                                                                                                                                            | 21755  |
| #36 | Search great britain[TIAB]                                                                                                                                                                                                                                                                                                             | 5559   |
| #37 | Search england[TIAB]                                                                                                                                                                                                                                                                                                                   | 28581  |
| #38 | Search english[TIAB]                                                                                                                                                                                                                                                                                                                   | 42906  |
| #39 | Search british[TIAB]                                                                                                                                                                                                                                                                                                                   | 33062  |
| #40 | Search "England"[Mesh]                                                                                                                                                                                                                                                                                                                 | 80622  |
| #41 | Search "Great Britain"[Mesh]                                                                                                                                                                                                                                                                                                           | 269425 |
| #42 | Search scotland[TIAB]                                                                                                                                                                                                                                                                                                                  | 10361  |
| #43 | Search scottish[TIAB]                                                                                                                                                                                                                                                                                                                  | 5569   |
| #44 | Search "Scotland"[Mesh]                                                                                                                                                                                                                                                                                                                | 18835  |
| #45 | Search ((((((((((#35) OR #36) OR #37) OR #38) OR #39) OR #40) OR #41) OR #42) OR #43) OR #44                                                                                                                                                                                                                                           | 355596 |
| #46 | Search (#45) AND #1                                                                                                                                                                                                                                                                                                                    | 946    |
| #47 | Select 946 document(s)                                                                                                                                                                                                                                                                                                                 | 946    |

|     |                                     |       |
|-----|-------------------------------------|-------|
| #48 | Search croatia*[TIAB]               | 4662  |
| #49 | Search "Croatia"[Mesh]              | 4088  |
| #50 | Search (#48) OR #49                 | 5931  |
| #51 | Search (#50) AND #1                 | 19    |
| #52 | Select 19 document(s)               | 19    |
| #53 | Search macedonia*[TIAB]             | 624   |
| #54 | Search "Macedonia (Republic)"[Mesh] | 218   |
| #55 | Search ((#53) OR #54) AND #1        | 2     |
| #56 | Select 2 document(s)                | 2     |
| #57 | Search iceland*[TIAB]               | 3918  |
| #58 | Search "Iceland"[Mesh]              | 2908  |
| #59 | Search (#57) OR #58                 | 4762  |
| #60 | Search (#59) AND #1                 | 8     |
| #61 | Select 8 document(s)                | 8     |
| #62 | Search montenegro[TIAB]             | 467   |
| #63 | Search "Montenegro"[Mesh]           | 48    |
| #64 | Search (#62) OR #63                 | 482   |
| #65 | Search (#64) AND #1                 | 0     |
| #66 | Search turkey[TIAB]                 | 19341 |
| #67 | Search turkish[TIAB]                | 8370  |
| #68 | Search "Turkey"[Mesh]               | 18142 |
| #69 | Search ((#66) OR #67) OR #68        | 31859 |
| #70 | Search (#69) AND #1                 | 29    |
| #71 | Select 29 document(s)               | 29    |
| #72 | Search liechtenstein[TIAB]          | 170   |
| #73 | Search "Liechtenstein"[Mesh]        | 24    |
| #74 | Search (#72) OR #73                 | 175   |
| #75 | Search (#74) AND #1                 | 1     |
| #76 | Select 1 document(s)                | 1     |
| #77 | Search norway[TIAB]                 | 18277 |
| #78 | Search norwegian[TIAB]              | 10917 |
| #79 | Search "Norway"[Mesh]               | 26667 |
| #80 | Search ((#77) OR #78) OR #79        | 30374 |
| #81 | Search (#80) AND #1                 | 89    |
| #82 | Select 89 document(s)               | 89    |
| #83 | Search switzerland[TIAB]            | 13227 |
| #84 | Search swiss[TIAB]                  | 20449 |
| #85 | Search "Switzerland"[Mesh]          | 24589 |
| #86 | Search ((#83) OR #84) OR #85        | 46592 |
| #87 | Search (#86) AND #1                 | 81    |
| #88 | Select 81 document(s)               | 81    |
| #89 | Search austria*[TIAB]               | 9948  |
| #90 | Search "Austria"[Mesh]              | 14236 |
| #91 | Search (#89) OR #90                 | 19632 |
| #92 | Search (#91) AND #1                 | 52    |
| #93 | Search "Belgium"[Mesh]              | 12125 |
| #94 | Search belgi*[TIAB]                 | 12949 |
| #95 | Search (#93) OR #94                 | 19101 |
| #96 | Search (#95) AND #1                 | 88    |
| #97 | Search bulgaria*[TIAB]              | 3823  |
| #98 | Search "Bulgaria"[Mesh]             | 5146  |

|      |                                        |        |
|------|----------------------------------------|--------|
| #99  | Search (#97) OR #98                    | 6758   |
| #100 | Search (#99) AND #1                    | 11     |
| #101 | Select 11 document(s)                  | 11     |
| #102 | Search cyprus[TIAB]                    | 889    |
| #103 | Search cypriot*[TIAB]                  | 327    |
| #104 | Search (#102) OR #103                  | 1077   |
| #105 | Search (#104) AND #1                   | 1      |
| #106 | Select 1 document(s)                   | 1      |
| #107 | Search czech*[TIAB]                    | 11003  |
| #108 | Search "Czech Republic"[Mesh]          | 4151   |
| #109 | Search (#107) OR #108                  | 12410  |
| #110 | Search (#109) AND #1                   | 31     |
| #111 | Select 31 document(s)                  | 31     |
| #112 | Search (denmark[TIAB]) OR danish[TIAB] | 26512  |
| #113 | Search "Denmark"[Mesh]                 | 33498  |
| #114 | Search (#112) OR #113                  | 44883  |
| #115 | Search (#114) AND #1                   | 122    |
| #116 | Select 122 document(s)                 | 122    |
| #117 | Search "Estonia"[Mesh]                 | 1617   |
| #118 | Search (estonia*[TIAB]) OR #57         | 2311   |
| #119 | Search (#117) OR #118                  | 44883  |
| #120 | Search (#119) AND #1                   | 5      |
| #121 | Select 5 document(s)                   | 5      |
| #122 | Search finland[TIAB]                   | 15635  |
| #123 | Search finish[TIAB]                    | 2839   |
| #124 | Search "Finland"[Mesh]                 | 25193  |
| #125 | Search ((#122) OR #123) OR #124        | 28012  |
| #126 | Search (#125) AND #1                   | 52     |
| #127 | Select 52 document(s)                  | 52     |
| #128 | Search france[TIAB]                    | 35892  |
| #129 | Search french[TIAB]                    | 37314  |
| #130 | Search "France"[Mesh]                  | 69885  |
| #131 | Search ((#128) OR #129) OR #130        | 109032 |
| #132 | Search (#131) AND #1                   | 376    |
| #133 | Select 376 document(s)                 | 376    |
| #134 | Search german*[TIAB]                   | 78658  |
| #135 | Search "Germany"[Mesh]                 | 113364 |
| #136 | Search (#134) OR #135                  | 158165 |
| #137 | Search (#136) AND #1                   | 516    |
| #138 | Select 516 document(s)                 | 516    |
| #139 | Search greece[TIAB]                    | 8010   |
| #140 | Search greek[TIAB]                     | 7278   |
| #141 | Search "Greece"[Mesh]                  | 12110  |
| #142 | Search ((#140) OR #82) OR #141         | 18821  |
| #143 | Search (#142) AND #1                   | 28     |
| #144 | Select 28 document(s)                  | 28     |
| #145 | Search hungary[TIAB]                   | 6644   |
| #146 | Search hungarian[TIAB]                 | 4531   |
| #147 | Search "Hungary"[Mesh]                 | 14629  |
| #148 | Search ((#145) OR #146) OR #147        | 18641  |
| #149 | Search (#148) AND #1                   | 36     |

|      |                                                                                                                                                                                                                                                                                                                                              |         |
|------|----------------------------------------------------------------------------------------------------------------------------------------------------------------------------------------------------------------------------------------------------------------------------------------------------------------------------------------------|---------|
| #150 | Select 36 document(s)                                                                                                                                                                                                                                                                                                                        | 36      |
| #151 | Search ireland[TIAB]                                                                                                                                                                                                                                                                                                                         | 10882   |
| #152 | Search irish[TIAB]                                                                                                                                                                                                                                                                                                                           | 4994    |
| #153 | Search "Ireland"[Mesh]                                                                                                                                                                                                                                                                                                                       | 11188   |
| #154 | Search ((#151) OR #152) OR #153                                                                                                                                                                                                                                                                                                              | 13417   |
| #155 | Search (#154) AND #1                                                                                                                                                                                                                                                                                                                         | 33      |
| #156 | Select 33 document(s)                                                                                                                                                                                                                                                                                                                        | 33      |
| #157 | Search italy[TIAB]                                                                                                                                                                                                                                                                                                                           | 33945   |
| #158 | Search italian[TIAB]                                                                                                                                                                                                                                                                                                                         | 25642   |
| #159 | Search "Italy"[Mesh]                                                                                                                                                                                                                                                                                                                         | 61304   |
| #160 | Search ((#157) OR #158) OR #159                                                                                                                                                                                                                                                                                                              | 86457   |
| #161 | Search (#160) AND #1                                                                                                                                                                                                                                                                                                                         | 233     |
| #162 | Select 233 document(s)                                                                                                                                                                                                                                                                                                                       | 233     |
| #163 | Search latvia*[TIAB]                                                                                                                                                                                                                                                                                                                         | 862     |
| #164 | Search "Latvia"[Mesh]                                                                                                                                                                                                                                                                                                                        | 878     |
| #165 | Search (#163) OR #164                                                                                                                                                                                                                                                                                                                        | 1257    |
| #166 | Search (#165) AND #1                                                                                                                                                                                                                                                                                                                         | 0       |
| #167 | Search Lithuania*[TIAB]                                                                                                                                                                                                                                                                                                                      | 1741    |
| #168 | Search "Lithuania"[Mesh]                                                                                                                                                                                                                                                                                                                     | 1844    |
| #170 | Search (#167) OR #168                                                                                                                                                                                                                                                                                                                        | 2467    |
| #171 | Search (#170) AND #1                                                                                                                                                                                                                                                                                                                         | 4       |
| #172 | Select 4 document(s)                                                                                                                                                                                                                                                                                                                         | 4       |
| #173 | Search luxembourg*[TIAB]                                                                                                                                                                                                                                                                                                                     | 588     |
| #174 | Search "Luxembourg"[Mesh]                                                                                                                                                                                                                                                                                                                    | 464     |
| #175 | Search (#173) OR #174                                                                                                                                                                                                                                                                                                                        | 778     |
| #176 | Search (#175) AND #1                                                                                                                                                                                                                                                                                                                         | 0       |
| #177 | Search europe*[TIAB]                                                                                                                                                                                                                                                                                                                         | 143484  |
| #178 | Search "Europe"[Mesh]                                                                                                                                                                                                                                                                                                                        | 989034  |
| #179 | Search "European Union"[Mesh]                                                                                                                                                                                                                                                                                                                | 10045   |
| #180 | Search ((#177) OR #178) OR #179                                                                                                                                                                                                                                                                                                              | 1074955 |
| #181 | Search (((((((("Drug Approval"[Mesh])) OR ("Drug Evaluation"[Mesh])) OR ("Technology Assessment, Biomedical"[Mesh])) OR ("Outcome Assessment (Health Care)"[Mesh])) OR (assessment[TIAB])) OR (approval[TIAB])) OR (evaluation[TIAB])) OR (review[TIAB])) OR ("Advisory Committees"[Mesh])) OR ("Comparative Effectiveness Research"[Mesh])) | 2265165 |
| #182 | Search (((((((pharmaceuticals[TI]) OR (drugs[TI]) OR (medicines[TI])) OR ("Pharmaceutical Preparations"[Mesh]))) AND (((((((reimbursement[TI]) OR (pricing[TI]) OR ("Insurance Coverage"[Mesh])) OR ("Costs and Cost Analysis"[Mesh])) OR ("Insurance, Health, Reimbursement"[Mesh])) OR ("Insurance Benefits"[Mesh]))                       | 6094    |
| #183 | Search (#180) AND #182                                                                                                                                                                                                                                                                                                                       | 1335    |
| #184 | Search (#183) AND #181                                                                                                                                                                                                                                                                                                                       | 409     |
| #185 | Select 409 document(s)                                                                                                                                                                                                                                                                                                                       | 409     |
