# Supplementary material for: From market access to patient access: overview of evidence-based approaches for the reimbursement and pricing of pharmaceuticals in 36 European countries
Source: PubMed Central journal article supplement (PMC4583728; doi:10.1186/s12961-015-0028-5), 2015-09-25
Supplement: 12961_2015_28_MOESM3_ESM.pdf [file 12961_2015_28_MOESM3_ESM.pdf]

Additional file 3: Sources of information per country

|                                                                                                                                     |                                                                                                                                                                                                                                                                                                                                                                                                                                                                                                                                     |
|-------------------------------------------------------------------------------------------------------------------------------------|-------------------------------------------------------------------------------------------------------------------------------------------------------------------------------------------------------------------------------------------------------------------------------------------------------------------------------------------------------------------------------------------------------------------------------------------------------------------------------------------------------------------------------------|
| <b>Austria</b>                                                                                                                      |                                                                                                                                                                                                                                                                                                                                                                                                                                                                                                                                     |
| Ministry of Health, Independent Drugs Commission                                                                                    | <a href="http://www.bmg.gv.at/home/Schwerpunkte/Medizin/Arzneimittel/B_eiraete_und_Kommissionen/Unabhaengige_Heilmittelkommission">http://www.bmg.gv.at/home/Schwerpunkte/Medizin/Arzneimittel/B_eiraete_und_Kommissionen/Unabhaengige_Heilmittelkommission</a>                                                                                                                                                                                                                                                                     |
| Austrian Health Insurance, Drug Evaluation Commission                                                                               | <a href="http://www.sozialversicherung.at/portal27/portal/esvportal/channel_content/cmsWindow?action=2&amp;p_menuid=64715&amp;p_tabid=5">http://www.sozialversicherung.at/portal27/portal/esvportal/channel_content/cmsWindow?action=2&amp;p_menuid=64715&amp;p_tabid=5</a>                                                                                                                                                                                                                                                         |
| Austrian Health Insurance, Drug Evaluation Commission Members                                                                       | <a href="http://www.sozialversicherung.at/portal27/portal/esvportal/channel_content/cmsWindow?action=2&amp;p_menuid=71895&amp;p_tabid=5">http://www.sozialversicherung.at/portal27/portal/esvportal/channel_content/cmsWindow?action=2&amp;p_menuid=71895&amp;p_tabid=5</a>                                                                                                                                                                                                                                                         |
| Association of Austrian Social Security Institutions, Code of Procedure for the development of the positive list (Erstattungskodex) | <a href="https://www.avsv.at/avi/dokument/binaerdokument_download.pdf?dokid=2004=47&amp;dokStat=0&amp;contTyp=application/pdf">https://www.avsv.at/avi/dokument/binaerdokument_download.pdf?dokid=2004=47&amp;dokStat=0&amp;contTyp=application/pdf</a>                                                                                                                                                                                                                                                                             |
| <b>Belgium</b>                                                                                                                      |                                                                                                                                                                                                                                                                                                                                                                                                                                                                                                                                     |
| National Medical Insurance Association, Pharmaceuticals                                                                             | <a href="http://www.inami.fgov.be/fr/themes/cout-remboursement/par-mutualite/medicament-produits-sante/Pages/default.aspx#VLAdpns7_-o">http://www.inami.fgov.be/fr/themes/cout-remboursement/par-mutualite/medicament-produits-sante/Pages/default.aspx#VLAdpns7_-o</a>                                                                                                                                                                                                                                                             |
| National Medical Insurance Association, Costs and Reimbursement                                                                     | <a href="http://www.inami.fgov.be/fr/themes/cout-remboursement/par-mutualite/medicament-produits-sante/remboursement/specialites/procedure/Pages/default.aspx#Peut_-_on_modifier_les_conditions_de_remboursement_d%e2%80%99une_sp%c3%a9cialit%c3%a9_pharmaceutique?">http://www.inami.fgov.be/fr/themes/cout-remboursement/par-mutualite/medicament-produits-sante/remboursement/specialites/procedure/Pages/default.aspx#Peut_-_on_modifier_les_conditions_de_remboursement_d%e2%80%99une_sp%c3%a9cialit%c3%a9_pharmaceutique?</a> |
| <b>Bulgaria</b>                                                                                                                     |                                                                                                                                                                                                                                                                                                                                                                                                                                                                                                                                     |
| National Council on Prices and Reimbursement of Medicinal Products, About the Reimbursement Commission                              | <a href="http://www.ncpr.bg/bg/%D0%BD%D1%81%D1%86%D1%80%D0%BB%D0%BF/%D0%B7%D0%B0-%D1%81%D1%8A%D0%B2%D0%B5%D1%82%D0%B0">http://www.ncpr.bg/bg/%D0%BD%D1%81%D1%86%D1%80%D0%BB%D0%BF/%D0%B7%D0%B0-%D1%81%D1%8A%D0%B2%D0%B5%D1%82%D0%B0</a>                                                                                                                                                                                                                                                                                             |
| Regulations of National Pricing and Reimbursement Commission organization and its administration.                                   | <a href="http://www.ncpr.bg/images/demo/Ystroistven_pravilnik_NCPR.pdf">http://www.ncpr.bg/images/demo/Ystroistven_pravilnik_NCPR.pdf</a><br><a href="http://www.ncpr.bg/images/bul_zakonodatelstvo/Naredba-1.pdf">http://www.ncpr.bg/images/bul_zakonodatelstvo/Naredba-1.pdf</a>                                                                                                                                                                                                                                                  |
| <b>Cyprus</b>                                                                                                                       |                                                                                                                                                                                                                                                                                                                                                                                                                                                                                                                                     |
| Ministry of Health, Pharmaceutical Services, Committee for human medicines, Website                                                 | <a href="http://www.moh.gov.cy/moh/phs/phs.nsf/dmlphcomm_gr/dmlphcomm_gr?OpenDocument">http://www.moh.gov.cy/moh/phs/phs.nsf/dmlphcomm_gr/dmlphcomm_gr?OpenDocument</a>                                                                                                                                                                                                                                                                                                                                                             |
| Ministry of Health, Committee on the Pricing of Medicines                                                                           | <a href="http://www.moh.gov.cy/moh/phs/phs.nsf/dmlps13_gr/dmlps13_gr?OpenDocument">http://www.moh.gov.cy/moh/phs/phs.nsf/dmlps13_gr/dmlps13_gr?OpenDocument</a>                                                                                                                                                                                                                                                                                                                                                                     |
| <b>Czech Republic</b>                                                                                                               |                                                                                                                                                                                                                                                                                                                                                                                                                                                                                                                                     |
| State Institute for Drug Control, Regulation of prices and reimbursements for pharmaceuticals                                       | <a href="http://www.sukl.eu/medicines/regulation-of-prices-and-reimbursements-for-pharmaceuticals">http://www.sukl.eu/medicines/regulation-of-prices-and-reimbursements-for-pharmaceuticals</a>                                                                                                                                                                                                                                                                                                                                     |
| Law on statutory health insurance, 2011                                                                                             | <a href="http://portal.gov.cz/app/zakony/zakonPar.jsp?page=0&amp;idBiblio=75498&amp;recShow=30&amp;nr=376~2F2011&amp;rpp=50#parCnt">http://portal.gov.cz/app/zakony/zakonPar.jsp?page=0&amp;idBiblio=75498&amp;recShow=30&amp;nr=376~2F2011&amp;rpp=50#parCnt</a>                                                                                                                                                                                                                                                                   |
| Law on statutory health insurance, 1997                                                                                             | <a href="http://portal.gov.cz/app/zakony/zakonPar.jsp?page=0&amp;idBiblio=45178&amp;recShow=48&amp;fulltext=&amp;nr=48~2F1997&amp;part=&amp;name=&amp;rpp=100#parCnt">http://portal.gov.cz/app/zakony/zakonPar.jsp?page=0&amp;idBiblio=45178&amp;recShow=48&amp;fulltext=&amp;nr=48~2F1997&amp;part=&amp;name=&amp;rpp=100#parCnt</a>                                                                                                                                                                                               |
| <b>Germany</b>                                                                                                                      |                                                                                                                                                                                                                                                                                                                                                                                                                                                                                                                                     |
| Federal Joing Committee (G-BA), Composition                                                                                         | <a href="https://www.g-ba.de/downloads/17-98-2436/AufbauVorsitz_10-02-2015_deutsch.pdf?">https://www.g-ba.de/downloads/17-98-2436/AufbauVorsitz_10-02-2015_deutsch.pdf?</a>                                                                                                                                                                                                                                                                                                                                                         |
| G-BA, Code of Procedure                                                                                                             | <a href="https://www.g-ba.de/informationen/richtlinien/42/">https://www.g-ba.de/informationen/richtlinien/42/</a>                                                                                                                                                                                                                                                                                                                                                                                                                   |
| Institute for Quality and Efficiency in Health Care, General Methods                                                                | <a href="https://www.iqwig.de/en/methods/methods-papers/general-methods.3020.html">https://www.iqwig.de/en/methods/methods-papers/general-methods.3020.html</a>                                                                                                                                                                                                                                                                                                                                                                     |

|                                                                                                                                |                                                                                                                                                                                                                                                                                                                                                                                                                                                                     |
|--------------------------------------------------------------------------------------------------------------------------------|---------------------------------------------------------------------------------------------------------------------------------------------------------------------------------------------------------------------------------------------------------------------------------------------------------------------------------------------------------------------------------------------------------------------------------------------------------------------|
| <b>Denmark</b>                                                                                                                 |                                                                                                                                                                                                                                                                                                                                                                                                                                                                     |
| Reimbursement Committee, Website                                                                                               | <a href="http://laegemiddelstyrelsen.dk/en/topics/statistics,-prices-and-reimbursement/reimbursement/the-reimbursement-committee">http://laegemiddelstyrelsen.dk/en/topics/statistics,-prices-and-reimbursement/reimbursement/the-reimbursement-committee</a>                                                                                                                                                                                                       |
| <b>Estonia</b>                                                                                                                 |                                                                                                                                                                                                                                                                                                                                                                                                                                                                     |
| Estonian Medicines Agency, Reimbursed Pharmaceuticals                                                                          | <a href="http://www.sam.ee/soodusravimid-0">http://www.sam.ee/soodusravimid-0</a>                                                                                                                                                                                                                                                                                                                                                                                   |
| Health Insurance Act, 2002                                                                                                     | <a href="https://www.riigiteataja.ee/en/eli/527012015004/consolide">https://www.riigiteataja.ee/en/eli/527012015004/consolide</a>                                                                                                                                                                                                                                                                                                                                   |
| Ministry of Social Affairs, Procedure for drafting the positive list,                                                          | <a href="https://www.riigiteataja.ee/en/eli/509102014007/consolide">https://www.riigiteataja.ee/en/eli/509102014007/consolide</a>                                                                                                                                                                                                                                                                                                                                   |
| <b>Finland</b>                                                                                                                 |                                                                                                                                                                                                                                                                                                                                                                                                                                                                     |
| Pharmaceuticals Pricing Board, Website                                                                                         | <a href="http://www.stm.fi/en/ministry/boards/pharmaboard/frontpage">http://www.stm.fi/en/ministry/boards/pharmaboard/frontpage</a>                                                                                                                                                                                                                                                                                                                                 |
| Guidelines for preparing an economic evaluation, Ministry of Social Affairs and Health, Pharmaceuticals Pricing Board May 2011 | <a href="http://www.stm.fi/c/document_library/get_file?folderId=71837&amp;name=DLFE-15657.pdf">http://www.stm.fi/c/document_library/get_file?folderId=71837&amp;name=DLFE-15657.pdf</a>                                                                                                                                                                                                                                                                             |
| <b>France</b>                                                                                                                  |                                                                                                                                                                                                                                                                                                                                                                                                                                                                     |
| Haute Autorité de Santé, general methods                                                                                       | <a href="http://www.has-sante.fr/portail/upload/docs/application/pdf/general_method_eval_techno.pdf">http://www.has-sante.fr/portail/upload/docs/application/pdf/general_method_eval_techno.pdf</a>                                                                                                                                                                                                                                                                 |
| HAS, Transparency Commission                                                                                                   | <a href="http://www.has-sante.fr/portail/jcms/c_412210/fr/commission-de-la-transparence">http://www.has-sante.fr/portail/jcms/c_412210/fr/commission-de-la-transparence</a>                                                                                                                                                                                                                                                                                         |
| HAS, Methods guide                                                                                                             | <a href="http://www.has-sante.fr/portail/jcms/c_434715/fr/guide-danalyse-de-la-litterature-et-gradation-des-recommandations?xtmc=&amp;xtcr=1">http://www.has-sante.fr/portail/jcms/c_434715/fr/guide-danalyse-de-la-litterature-et-gradation-des-recommandations?xtmc=&amp;xtcr=1</a>                                                                                                                                                                               |
| HAS, submission guidelines                                                                                                     | <a href="http://www.has-sante.fr/portail/upload/docs/application/pdf/2012-07/notice_depot_ct_v27072012.pdf">http://www.has-sante.fr/portail/upload/docs/application/pdf/2012-07/notice_depot_ct_v27072012.pdf</a>                                                                                                                                                                                                                                                   |
| Social Security Code                                                                                                           | <a href="http://legifrance.gouv.fr/affichCode.do?sessionId=F8C50E8E0082009C193CD2C19D74C3CD.tpdjo16v_2?idArticle=LEGIARTI000006746686&amp;idSectionTA=LEGISCTA000006173275&amp;cidTexte=LEGITEXT000006073189&amp;dateTexte=19991029">http://legifrance.gouv.fr/affichCode.do?sessionId=F8C50E8E0082009C193CD2C19D74C3CD.tpdjo16v_2?idArticle=LEGIARTI000006746686&amp;idSectionTA=LEGISCTA000006173275&amp;cidTexte=LEGITEXT000006073189&amp;dateTexte=19991029</a> |
| <b>Hungary</b>                                                                                                                 |                                                                                                                                                                                                                                                                                                                                                                                                                                                                     |
| National Health Insurance Fund Administration, tasks                                                                           | <a href="http://www.oep.hu/felso_menu/rolunk/kozerdeku_adatok/tevekenysegre_mukodesre_vonatkozo_adatok/a_szerv_feladata_alaptevekenysege_es_hatarkore/en_a_szerv_alaptevekenyega_feladata_es_hatarkore">http://www.oep.hu/felso_menu/rolunk/kozerdeku_adatok/tevekenysegre_mukodesre_vonatkozo_adatok/a_szerv_feladata_alaptevekenysege_es_hatarkore/en_a_szerv_alaptevekenyega_feladata_es_hatarkore</a>                                                           |
| National Institute for Quality and Organisational Development in Healthcare and Medicines (GYEMSZI)                            | <a href="http://www2.gyemszi.hu/site/index.php?page=en/General_information/Deed_of_Foundation_">http://www2.gyemszi.hu/site/index.php?page=en/General_information/Deed_of_Foundation_</a>                                                                                                                                                                                                                                                                           |
| Technology Appraisal Committee (TAC)                                                                                           | <a href="http://fogalomtar.eski.hu/index.php/T%C3%89B">http://fogalomtar.eski.hu/index.php/T%C3%89B</a>                                                                                                                                                                                                                                                                                                                                                             |
| NHIFA legislation monitor                                                                                                      | <a href="http://www.oep.hu/felso_menu/rolunk/jogszabalyfigyelo/jogszabalyvaltozasok">http://www.oep.hu/felso_menu/rolunk/jogszabalyfigyelo/jogszabalyvaltozasok</a>                                                                                                                                                                                                                                                                                                 |
| <b>Greece</b>                                                                                                                  |                                                                                                                                                                                                                                                                                                                                                                                                                                                                     |
| Law 4052 on the jurisdiction of the Ministry of Health and Solidarity and Ministry of Employment and Social Protection         | <a href="http://www.hellenicparliament.gr/Nomothetiko-Ergo/Anazitisi-Nomothetikou-Ergou?law_id=b8755db2947-4716-84f7-dc56a63db441">http://www.hellenicparliament.gr/Nomothetiko-Ergo/Anazitisi-Nomothetikou-Ergou?law_id=b8755db2947-4716-84f7-dc56a63db441</a>                                                                                                                                                                                                     |
| <b>Italy</b>                                                                                                                   |                                                                                                                                                                                                                                                                                                                                                                                                                                                                     |
| AIFA, new regulation on the CTS and CPR (2014)                                                                                 | <a href="http://www.agenziafarmaco.gov.it/it/content/regolamento-cts-cpr">http://www.agenziafarmaco.gov.it/it/content/regolamento-cts-cpr</a>                                                                                                                                                                                                                                                                                                                       |
| AIFA, Commissions                                                                                                              | <a href="http://www.agenziafarmaco.gov.it/it/content/commissioni-consultive-e-tecnico-scientifiche#cts">http://www.agenziafarmaco.gov.it/it/content/commissioni-consultive-e-tecnico-scientifiche#cts</a>                                                                                                                                                                                                                                                           |

|                                                                                                |                                                                                                                                                                                                                                                                                                                                                                                                 |
|------------------------------------------------------------------------------------------------|-------------------------------------------------------------------------------------------------------------------------------------------------------------------------------------------------------------------------------------------------------------------------------------------------------------------------------------------------------------------------------------------------|
| <b>Ireland</b>                                                                                 |                                                                                                                                                                                                                                                                                                                                                                                                 |
| Health Service Executive, About the Corporate Pharmaceutical Unit                              | <a href="http://www.hse.ie/eng/about/Who/cpu/about.html">http://www.hse.ie/eng/about/Who/cpu/about.html</a>                                                                                                                                                                                                                                                                                     |
| HSE, IPHA and APMI agreements                                                                  | <a href="http://www.hse.ie/eng/about/Who/cpu/IPHA_APMI_Agreements.html">http://www.hse.ie/eng/about/Who/cpu/IPHA_APMI_Agreements.html</a>                                                                                                                                                                                                                                                       |
| HSE, Template for reimbursement application                                                    | <a href="http://www.hse.ie/eng/about/Who/cpu/Notification_of_Intention_to_Seek_Reimbursement_Approval_15.pdf">http://www.hse.ie/eng/about/Who/cpu/Notification_of_Intention_to_Seek_Reimbursement_Approval_15.pdf</a>                                                                                                                                                                           |
| National Centre for Pharmacoeconomics, pharmacoeconomic evaluations                            | <a href="http://www.ncpe.ie/pharmacoeconomic-evaluations/">http://www.ncpe.ie/pharmacoeconomic-evaluations/</a>                                                                                                                                                                                                                                                                                 |
| NCPE, submission process                                                                       | <a href="http://www.ncpe.ie/submission-process/">http://www.ncpe.ie/submission-process/</a>                                                                                                                                                                                                                                                                                                     |
| <b>Latvia</b>                                                                                  |                                                                                                                                                                                                                                                                                                                                                                                                 |
| Cabinet of Ministers Regulations No.899, outpatient reimbursement of drugs and medical devices | <a href="http://likumi.lv/doc.php?id=147522">http://likumi.lv/doc.php?id=147522</a>                                                                                                                                                                                                                                                                                                             |
| National Health Service, compensations arrangements                                            | <a href="http://www.vmnvd.gov.lv/lv/kompensejamie-medikamenti/kompensacijas-kartiba">http://www.vmnvd.gov.lv/lv/kompensejamie-medikamenti/kompensacijas-kartiba</a>                                                                                                                                                                                                                             |
| <b>Lithuania</b>                                                                               |                                                                                                                                                                                                                                                                                                                                                                                                 |
| Ministry of Health Regulation, criteria for inclusion i the positive list                      | <a href="https://www.e-tar.lt/portal/legalAct.html?documentId=TAR.E83CFAB10E7B">https://www.e-tar.lt/portal/legalAct.html?documentId=TAR.E83CFAB10E7B</a>                                                                                                                                                                                                                                       |
| Ministry of Health, Reimbursement Commission                                                   | <a href="http://www.sam.lt/go.php/lit/Ligu-vaistiniu-preparatu-ir-medicinos-pagalbos-priemoniu-kompensavimokomisijos-veikla-">http://www.sam.lt/go.php/lit/Ligu-vaistiniu-preparatu-ir-medicinos-pagalbos-priemoniu-kompensavimokomisijos-veikla-</a>                                                                                                                                           |
| National Health Insurance Fund, reimbursable pharmaceuticals and medical aids                  | <a href="http://www.vlk.lt/sites/en/healthcare-in-lithuania/reimbursable-pharmaceuticals-and-medical-aids">http://www.vlk.lt/sites/en/healthcare-in-lithuania/reimbursable-pharmaceuticals-and-medical-aids</a>                                                                                                                                                                                 |
| <b>Luxemburg</b>                                                                               |                                                                                                                                                                                                                                                                                                                                                                                                 |
| Ministry of Social Security, organigram                                                        | <a href="http://www.mss.public.lu/acteurs/index.html">http://www.mss.public.lu/acteurs/index.html</a>                                                                                                                                                                                                                                                                                           |
| Social Security Medical Control (CMSS)                                                         | <a href="http://www.mss.public.lu/acteurs/cmss/index.html">http://www.mss.public.lu/acteurs/cmss/index.html</a>                                                                                                                                                                                                                                                                                 |
| Grand Ducal Regulation on reimbursement                                                        | <a href="http://www.secu.lu/assurance-maladie/reglements/reglement-grand-ducal-modifie-du-12-decembre-2002/">http://www.secu.lu/assurance-maladie/reglements/reglement-grand-ducal-modifie-du-12-decembre-2002/</a>                                                                                                                                                                             |
| <b>Malta</b>                                                                                   |                                                                                                                                                                                                                                                                                                                                                                                                 |
| Directorate of Pharmaceutical Affairs                                                          | <a href="https://ehealth.gov.mt/HealthPortal/chief_medical_officer/pharm_pol_mon/about_us.aspx">https://ehealth.gov.mt/HealthPortal/chief_medical_officer/pharm_pol_mon/about_us.aspx</a>                                                                                                                                                                                                       |
| Government Formulary                                                                           | <a href="https://ehealth.gov.mt/HealthPortal/chief_medical_officer/pharm_pol_mon/med_within_ghs/gov_form_list.aspx">https://ehealth.gov.mt/HealthPortal/chief_medical_officer/pharm_pol_mon/med_within_ghs/gov_form_list.aspx</a>                                                                                                                                                               |
| Pharmaceutical Health Technology Assessment Unit                                               | <a href="https://ehealth.gov.mt/HealthPortal/chief_medical_officer/pharm_pol_mon/pharm_hta_unit.aspx">https://ehealth.gov.mt/HealthPortal/chief_medical_officer/pharm_pol_mon/pharm_hta_unit.aspx</a>                                                                                                                                                                                           |
| Government Formulary List Advisory Committee                                                   | <a href="https://www.gov.mt/en/Government/Government%20of%20Malta/Ministries%20and%20Entities/Officially%20Appointed%20Bodies/Pages/Committees/Government-Formulary-List-Advisory-Committee-.aspx">https://www.gov.mt/en/Government/Government%20of%20Malta/Ministries%20and%20Entities/Officially%20Appointed%20Bodies/Pages/Committees/Government-Formulary-List-Advisory-Committee-.aspx</a> |
| <b>Netherlands</b>                                                                             |                                                                                                                                                                                                                                                                                                                                                                                                 |
| National Health Care Institut (Zorginstituut Nederland), Review of Medicines                   | <a href="https://www.zorginstituutnederland.nl/pakket/werkwijze+pakketbeheer/beoordeling+geneesmiddelen">https://www.zorginstituutnederland.nl/pakket/werkwijze+pakketbeheer/beoordeling+geneesmiddelen</a>                                                                                                                                                                                     |
| <b>Poland</b>                                                                                  |                                                                                                                                                                                                                                                                                                                                                                                                 |
| Ministry of Health, Principles of reimbursement                                                | <a href="http://www.mz.gov.pl/en/medication/reimbursement/principles-of-reimbursement">http://www.mz.gov.pl/en/medication/reimbursement/principles-of-reimbursement</a>                                                                                                                                                                                                                         |
| Treasury Board, Members, Website                                                               | <a href="http://www.aotm.gov.pl/index.php?id=11">http://www.aotm.gov.pl/index.php?id=11</a>                                                                                                                                                                                                                                                                                                     |
|                                                                                                | <a href="http://www.aotm.gov.pl/index.php?id=397">http://www.aotm.gov.pl/index.php?id=397</a>                                                                                                                                                                                                                                                                                                   |

|                                                                                                       |                                                                                                                                                                                                                                                                                                                                                   |
|-------------------------------------------------------------------------------------------------------|---------------------------------------------------------------------------------------------------------------------------------------------------------------------------------------------------------------------------------------------------------------------------------------------------------------------------------------------------|
| <b>Portugal</b>                                                                                       |                                                                                                                                                                                                                                                                                                                                                   |
| INFARMED, Economic Review, Price and Reimbursement                                                    | <a href="http://www.infarmed.pt/portal/page/portal/INFARMED/MEDICAMENTOS_USO_HUMANO/AVALIACAO_ECONOMICA_E_COM_PARTICIPACAO">http://www.infarmed.pt/portal/page/portal/INFARMED/MEDICAMENTOS_USO_HUMANO/AVALIACAO_ECONOMICA_E_COM_PARTICIPACAO</a>                                                                                                 |
| Guidelines for economic drug evaluation studies                                                       | <a href="http://www.infarmed.pt/portal/page/portal/INFARMED/ENGLISH/PCAEC04_vering.pdf">http://www.infarmed.pt/portal/page/portal/INFARMED/ENGLISH/PCAEC04_vering.pdf</a>                                                                                                                                                                         |
| <b>Romania</b>                                                                                        |                                                                                                                                                                                                                                                                                                                                                   |
| National Agency for Medicines and Medical Devices, Health Technology Assessment Unit                  | <a href="http://www.anm.ro/anmdm/en/evaluare_tehnologii_medicale.html">http://www.anm.ro/anmdm/en/evaluare_tehnologii_medicale.html</a>                                                                                                                                                                                                           |
| Ministry of Public Health, organigram                                                                 | <a href="http://www.ms.ro/upload/Anexa%201%20organigrama%2015.04.2014%20-%202.pdf">http://www.ms.ro/upload/Anexa%201%20organigrama%2015.04.2014%20-%202.pdf</a>                                                                                                                                                                                   |
| AMMD, relevant regulation                                                                             | <a href="http://www.anm.ro/anmdm/en/med_legislatie.html">http://www.anm.ro/anmdm/en/med_legislatie.html</a>                                                                                                                                                                                                                                       |
| <b>Slovenia</b>                                                                                       |                                                                                                                                                                                                                                                                                                                                                   |
| Health Insurance Institute of Slovenia, rules on the classification of medicines on the positive list | <a href="http://www.zzs.si/zzs/info/egradiva.nsf/o/54B4834F0D9B092DC1256CB40045469F?OpenDocument">http://www.zzs.si/zzs/info/egradiva.nsf/o/54B4834F0D9B092DC1256CB40045469F?OpenDocument</a>                                                                                                                                                     |
| Appointment of Commission members                                                                     | <a href="http://www.zzs.si/zzs/info/egradiva.nsf/o/42499159924406F2C12573C900342B88">http://www.zzs.si/zzs/info/egradiva.nsf/o/42499159924406F2C12573C900342B88</a>                                                                                                                                                                               |
| <b>Slovakia</b>                                                                                       |                                                                                                                                                                                                                                                                                                                                                   |
| Ministry of Health, Categorization of medicines                                                       | <a href="http://www.health.gov.sk/?kategorizacia-liekov">http://www.health.gov.sk/?kategorizacia-liekov</a>                                                                                                                                                                                                                                       |
| MoH, Guide for pharmacoeconomic analyses                                                              | <a href="http://www.health.gov.sk/?Dokumenty-Farmako-ekonomicky-a-medicinsko-ekonomicky-rozbor">http://www.health.gov.sk/?Dokumenty-Farmako-ekonomicky-a-medicinsko-ekonomicky-rozbor</a>                                                                                                                                                         |
| MoH, Regulation no. 07045-41 / 2012-OL, Scope of Price regulation                                     | <a href="http://www.health.gov.sk/Clanok?Opatrenie-07045-41">http://www.health.gov.sk/Clanok?Opatrenie-07045-41</a>                                                                                                                                                                                                                               |
| MoH, Establishing the positive list                                                                   | <a href="http://www.health.gov.sk/Clanok?oprava-v-opatreni-zo-16-3-2005-ktorym-sa-meni-a-doplna-opatrenie-ktorym-sa-vydava-zoznam-liecu-a-liekov-uhradzanych-na-zaklade-zp">http://www.health.gov.sk/Clanok?oprava-v-opatreni-zo-16-3-2005-ktorym-sa-meni-a-doplna-opatrenie-ktorym-sa-vydava-zoznam-liecu-a-liekov-uhradzanych-na-zaklade-zp</a> |
| <b>Spain</b>                                                                                          |                                                                                                                                                                                                                                                                                                                                                   |
| Directorate General for Basic Services Portfolio and Pharmacy, information                            | <a href="http://www.msssi.gob.es/organizacion/ministerio/organizacion/sgral_sanidad/dgcbssnsyfF.htm">http://www.msssi.gob.es/organizacion/ministerio/organizacion/sgral_sanidad/dgcbssnsyfF.htm</a>                                                                                                                                               |
| General Health Law                                                                                    | <a href="http://www.msssi.gob.es/organizacion/sns/planCalidadSNS/pdf/transparencia/Ley_14_86_GRAL_SANIDAD_1.pdf">http://www.msssi.gob.es/organizacion/sns/planCalidadSNS/pdf/transparencia/Ley_14_86_GRAL_SANIDAD_1.pdf</a>                                                                                                                       |
| Law 16/2003 on the cohesion and quality of the National Health Service                                | <a href="http://www.msssi.gob.es/organizacion/sns/planCalidadSNS/pdf/transparencia/LEY_COHESION_Y_CALIDAD.pdf">http://www.msssi.gob.es/organizacion/sns/planCalidadSNS/pdf/transparencia/LEY_COHESION_Y_CALIDAD.pdf</a>                                                                                                                           |
| Royal Decree 200/2012 on the basic organizational structure of the Ministry of Health                 | <a href="http://www.boe.es/diario_boe/txt.php?id=BOE-A-2012-1034">http://www.boe.es/diario_boe/txt.php?id=BOE-A-2012-1034</a>                                                                                                                                                                                                                     |
| <b>Sweden</b>                                                                                         |                                                                                                                                                                                                                                                                                                                                                   |
| TLV, Pricing and reimbursement of medicines                                                           | <a href="http://www.tlv.se/In-English/medicines-new/pricing-and-reimbursement-of-medicines/">http://www.tlv.se/In-English/medicines-new/pricing-and-reimbursement-of-medicines/</a>                                                                                                                                                               |
| TLV, Submission guidelines                                                                            | <a href="http://www.tlv.se/In-English/medicines-new/apply-for-a-price-or-reimbursement/">http://www.tlv.se/In-English/medicines-new/apply-for-a-price-or-reimbursement/</a>                                                                                                                                                                       |
| TLV, Pharmaceutical reviews                                                                           | <a href="http://www.tlv.se/Upload/English/ENG-handbook.pdf">http://www.tlv.se/Upload/English/ENG-handbook.pdf</a>                                                                                                                                                                                                                                 |
| <b>UK - Scotland</b>                                                                                  |                                                                                                                                                                                                                                                                                                                                                   |
| Scottish Medicines Consortium, Remit                                                                  | <a href="https://www.scottishmedicines.org.uk/About_SMC/What_we_do/Remit">https://www.scottishmedicines.org.uk/About_SMC/What_we_do/Remit</a>                                                                                                                                                                                                     |
| SMC, New Drugs Committee Members                                                                      | <a href="https://www.scottishmedicines.org.uk/About_SMC/Who_we_are/Membership/NDC_Membership">https://www.scottishmedicines.org.uk/About_SMC/Who_we_are/Membership/NDC_Membership</a>                                                                                                                                                             |

|                                                                                                                                                                                     |                                                                                                                                                                                                                                                                                                                                           |
|-------------------------------------------------------------------------------------------------------------------------------------------------------------------------------------|-------------------------------------------------------------------------------------------------------------------------------------------------------------------------------------------------------------------------------------------------------------------------------------------------------------------------------------------|
| The Scottish Government, Guidance to further Strengthen the safe and effective use of new medicines across the NHS                                                                  | <a href="http://www.sehd.scot.nhs.uk/cmo/CMO%282012%2901.pdf">http://www.sehd.scot.nhs.uk/cmo/CMO%282012%2901.pdf</a>                                                                                                                                                                                                                     |
| SMC, Submission guidance                                                                                                                                                            | <a href="https://www.scottishmedicines.org.uk/Submission_Process/Submission_Process">https://www.scottishmedicines.org.uk/Submission_Process/Submission_Process</a>                                                                                                                                                                       |
| SMC, Guidance process                                                                                                                                                               | <a href="https://www.scottishmedicines.org.uk/files/sign/SIGN_SMC_Algorithm_MAR10_new.pdf">https://www.scottishmedicines.org.uk/files/sign/SIGN_SMC_Algorithm_MAR10_new.pdf</a>                                                                                                                                                           |
| <b>UK - England</b>                                                                                                                                                                 |                                                                                                                                                                                                                                                                                                                                           |
| National Institute for Health and Care Excellence, guide to the process of technology appraisal                                                                                     | <a href="https://www.nice.org.uk/article/pmg19/chapter/Acknowledgements">https://www.nice.org.uk/article/pmg19/chapter/Acknowledgements</a>                                                                                                                                                                                               |
| NICE, guide to the methods of technology appraisal 2013                                                                                                                             | <a href="https://www.nice.org.uk/article/pmg9/chapter/Foreword">https://www.nice.org.uk/article/pmg9/chapter/Foreword</a>                                                                                                                                                                                                                 |
| NICE, specification for company submission of evidence                                                                                                                              | <a href="https://www.nice.org.uk/about/what-we-do/our-programmes/nice-guidance/nice-technology-appraisal-guidance">https://www.nice.org.uk/about/what-we-do/our-programmes/nice-guidance/nice-technology-appraisal-guidance</a>                                                                                                           |
| <b>Croatia</b>                                                                                                                                                                      |                                                                                                                                                                                                                                                                                                                                           |
| Ministry of Health, specifications for price-setting                                                                                                                                | <a href="http://narodne-novine.nn.hr/clanci/sluzbeni/2013_07_83_1801.html">http://narodne-novine.nn.hr/clanci/sluzbeni/2013_07_83_1801.html</a>                                                                                                                                                                                           |
| Ministry of Health, specifications for reimbursement                                                                                                                                | <a href="http://narodne-novine.nn.hr/clanci/sluzbeni/2013_07_83_1803.html">http://narodne-novine.nn.hr/clanci/sluzbeni/2013_07_83_1803.html</a>                                                                                                                                                                                           |
| <b>Iceland</b>                                                                                                                                                                      |                                                                                                                                                                                                                                                                                                                                           |
| Icelandic Medicine Pricing and Reimbursement Committee, details in English                                                                                                          | <a href="http://www.lgn.is/index.php?pageid=62">http://www.lgn.is/index.php?pageid=62</a>                                                                                                                                                                                                                                                 |
| <b>Macedonia</b>                                                                                                                                                                    |                                                                                                                                                                                                                                                                                                                                           |
| Ministry of Health, Amendment and supplement to the Health Insurance Act from 17.02.2012 (Official Gazette 26/2012), Paragraph 9                                                    | <a href="http://www.fzo.org.mk/WBStorage/Files/3.%20ZAKON%20ZA%20OZMENUVANJE%20I%20DOPOLNUVANJE%20NA%20ZAKONOT%20ZA%20ZDRAVSTVENOTO%20OSIGURUVANJE%206%20od%202012.pdf">http://www.fzo.org.mk/WBStorage/Files/3.%20ZAKON%20ZA%20OZMENUVANJE%20I%20DOPOLNUVANJE%20NA%20ZAKONOT%20ZA%20ZDRAVSTVENOTO%20OSIGURUVANJE%206%20od%202012.pdf</a> |
| Decree on the method and methodology on determining and adoption of pharmaceutical reimbursement list covered by the Health Insurance Fund of Macedonia (Official Gazette 116/2012) | <a href="http://www.fzo.org.mk/WBStorage/Files/Lista%20na%20Lekovi%20OPredlog.pdf">http://www.fzo.org.mk/WBStorage/Files/Lista%20na%20Lekovi%20OPredlog.pdf</a>                                                                                                                                                                           |
| <b>Montenegro</b>                                                                                                                                                                   |                                                                                                                                                                                                                                                                                                                                           |
| Ministry of Health, Regulation on the basic and supplementary lists of medicines                                                                                                    | <a href="http://www.fzocg.me/docs/166/uredbom_o_kriterijumima_za_utvrdivanje_osnovne_i_dopunske_liste_ljekova.pdf">http://www.fzocg.me/docs/166/uredbom_o_kriterijumima_za_utvrdivanje_osnovne_i_dopunske_liste_ljekova.pdf</a>                                                                                                           |
| MoH, Decision on the List of medicines prescribed and issued at the expense of the Health Insurance Fund                                                                            | <a href="http://www.sluzbenilist.me/PravniAktDetalji.aspx?tag=%7BEC557B08-3AC7-404F-8A4D-9443C573FAC3%7D">http://www.sluzbenilist.me/PravniAktDetalji.aspx?tag=%7BEC557B08-3AC7-404F-8A4D-9443C573FAC3%7D</a>                                                                                                                             |
| <b>Turkey</b>                                                                                                                                                                       |                                                                                                                                                                                                                                                                                                                                           |
| Social Security Institution, Process and Principles of the Reimbursement Commission                                                                                                 | <a href="http://www.sgk.gov.tr/wps/wcm/connect/ab787daf-84f3-4401-9f1a-d5fea06660ec/yonerge_03072014.pdf?MOD=AJPERES&amp;CACHEID=ab787daf-84f3-4401-9f1a-d5fea06660ec">http://www.sgk.gov.tr/wps/wcm/connect/ab787daf-84f3-4401-9f1a-d5fea06660ec/yonerge_03072014.pdf?MOD=AJPERES&amp;CACHEID=ab787daf-84f3-4401-9f1a-d5fea06660ec</a>   |
| Social Security Institution, Vision, Mission and Core Values                                                                                                                        | <a href="http://www.sgk.gov.tr/wps/portal/en">http://www.sgk.gov.tr/wps/portal/en</a>                                                                                                                                                                                                                                                     |

|                                                                                                                                           |                                                                                                                                                                                                                                                                                                                                                                             |
|-------------------------------------------------------------------------------------------------------------------------------------------|-----------------------------------------------------------------------------------------------------------------------------------------------------------------------------------------------------------------------------------------------------------------------------------------------------------------------------------------------------------------------------|
| <b>Serbia</b>                                                                                                                             |                                                                                                                                                                                                                                                                                                                                                                             |
| Ministry of Health, Regulation on the conditions, criteria, methods and procedures for placing the medicinal product on the positive list | <a href="http://www.rfzo.rs/download/pravilnici/lekovi/Pravilnik_o_kriteriju_mima10%20122014.pdf">http://www.rfzo.rs/download/pravilnici/lekovi/Pravilnik_o_kriteriju_mima10%20122014.pdf</a>                                                                                                                                                                               |
| <b>Liechtenstein</b>                                                                                                                      |                                                                                                                                                                                                                                                                                                                                                                             |
| Liechtenstein Official Gazette, Ordinance on the Social Security Law                                                                      | <a href="https://www.gesetze.li/DisplayLGBI.jsp?Jahr=2000&amp;Nr=74">https://www.gesetze.li/DisplayLGBI.jsp?Jahr=2000&amp;Nr=74</a>                                                                                                                                                                                                                                         |
| <b>Norway</b>                                                                                                                             |                                                                                                                                                                                                                                                                                                                                                                             |
| Norwegian Medicines Agency, Pricing and Reimbursement                                                                                     | <a href="http://www.legemiddelverket.no/English/price_and_reimbursement/Sider/default.aspx">http://www.legemiddelverket.no/English/price_and_reimbursement/Sider/default.aspx</a>                                                                                                                                                                                           |
| NoMA, General Reimbursement                                                                                                               | <a href="http://www.legemiddelverket.no/English/price_and_reimbursement/general_reimbursement/Sider/default.aspx">http://www.legemiddelverket.no/English/price_and_reimbursement/general_reimbursement/Sider/default.aspx</a>                                                                                                                                               |
| NoMA, application for reimbursement                                                                                                       | <a href="http://www.legemiddelverket.no/English/price_and_reimbursement/application_for_reimbursement/Sider/default.aspx">http://www.legemiddelverket.no/English/price_and_reimbursement/application_for_reimbursement/Sider/default.aspx</a>                                                                                                                               |
| NoMa, Guidelines on how to conduct pharmacoeconomic analyses                                                                              | <a href="http://www.legemiddelverket.no/English/price_and_reimbursement/application_for_reimbursement/Lists/PageAttachments/default/NO/P_harmaco-economic%20guidelines%20-%20Norway.pdf">http://www.legemiddelverket.no/English/price_and_reimbursement/application_for_reimbursement/Lists/PageAttachments/default/NO/P_harmaco-economic%20guidelines%20-%20Norway.pdf</a> |
| <b>Switzerland</b>                                                                                                                        |                                                                                                                                                                                                                                                                                                                                                                             |
| Federal Office of Public Health, Composition of the Federal Drug Commission                                                               | <a href="http://www.admin.ch/ch/d/sr/832_102/a37e.html">http://www.admin.ch/ch/d/sr/832_102/a37e.html</a>                                                                                                                                                                                                                                                                   |
| Federal Office of Public Health, Handbook on the positive list                                                                            | <a href="http://www.bag.admin.ch/themen/krankenversicherung/06492/07568/index.html">http://www.bag.admin.ch/themen/krankenversicherung/06492/07568/index.html</a>                                                                                                                                                                                                           |
