# Supplementary material for: From market access to patient access: overview of evidence-based approaches for the reimbursement and pricing of pharmaceuticals in 36 European countries
Source: PubMed Central journal article supplement (PMC4583728; doi:10.1186/s12961-015-0028-5), 2015-09-25
Supplement: 12961_2015_28_MOESM4_ESM.pdf [file 12961_2015_28_MOESM4_ESM.pdf]

Table 1 Overview of evidence-based decision-making processes for pharmaceutical coverage in 36 countries

| Country         | Institution in charge of coverage | Remit              | Purpose of appraising value         | Initial evidence report |                  | Evidence assessment team | Appraisal Committee (members, term) | Reassessment        |           |        | Restrictions | Final political decision |
|-----------------|-----------------------------------|--------------------|-------------------------------------|-------------------------|------------------|--------------------------|-------------------------------------|---------------------|-----------|--------|--------------|--------------------------|
|                 |                                   |                    |                                     | Producer                | Costs considered |                          |                                     | Regular             | Ad hoc    |        |              |                          |
|                 |                                   |                    |                                     |                         |                  |                          |                                     |                     | Initiator | Reason |              |                          |
| Austria         | HVB                               | NAM, POM<br>OP     | RS maximum price                    | M                       | CbC              | HEK at HVB               | HEK (20/5)                          | no                  | HEK, M    | E,I    | I, MB, PrG   | HVB                      |
| Belgium         | INAMI                             | NAM, RM<br>OP, IP  | RS (level)                          | M                       | CbC              | INAMI staff              | CRM at INAMI (31/6)                 | innov. drugs 1.5-3y | CRM/MoSA  | -      | I, PaG, PS   | MoSA                     |
| <b>Bulgaria</b> | CPR (MoH)                         | NAM, POM<br>OP, IP | RS maximum price, PR classification | M                       | CbC              | CPR                      | CPR (7/-)                           | no                  | CPR/M     | E      | I, DD, PaG   | CPR                      |
| <b>Croatia</b>  | HZZO                              | NAM<br>OP, IP      | RS (level)<br>PR classification     | M                       | CbC              | RC at HZZO               | RC (13/-)                           | no                  | M         | I      | PaG, PS, PrG | HZZO Board               |
| Cyprus          | CHM (MoH)                         | NAM<br>OP, IP      | RS tenders                          | M                       | yes              | CPD at CHM               | CHM (12/3)                          | -                   | -         | -      | PaG          | CHM                      |

**Legend:** CbC = case by case; DD = duration of disease; E = evidence; I = indication; IP = inpatient; M = manufacturer; MB = Medical Benefit; NAM = newly authorized medicines; OP = outpatient; PaG = patient group; POM = prescription-only medicine; PR = price referencing; PrG = professional group; PS = product-specific; RM = reimbursed medicines; RS = reimbursement status; TP = treatment programme; y = years; “-” = no information found. **Institutional abbreviations:** CHM - Committee for Human Medicines; CPD - Clinical Pharmacy Department; CPR - Commission for Pricing and Reimbursement; CRM - Drug Reimbursement Committee; HEK – Drugs Evaluation Commission; HVB - Association of Austrian Social Security Institutions; HZZO - Croatian Institute for Health Insurance; INAMI - Belgian Statutory National Medical Insurance Association; MoH – Ministry of Health; MoSA - Ministry of Social Affairs; RC – Reimbursement Committee.

Table 1 Overview of evidence-based decision-making processes for pharmaceutical coverage in 36 countries (cont.)

| Country        | Institution in charge of coverage | Remit                               | Purpose of appraising value  | Initial evidence report |                  | Evidence assessment team | Appraisal Committee (members, term) | Reassessment              |                   |        | Restrictions | Final political decision |
|----------------|-----------------------------------|-------------------------------------|------------------------------|-------------------------|------------------|--------------------------|-------------------------------------|---------------------------|-------------------|--------|--------------|--------------------------|
|                |                                   |                                     |                              | Producer                | Costs considered |                          |                                     | Regular                   | Ad hoc            |        |              |                          |
|                |                                   |                                     |                              |                         |                  |                          |                                     |                           | Initiator         | Reason |              |                          |
| Czech Republic | SÚKL                              | IP - NAM, POM<br>OP – all reimburs. | RS maximum price             | M                       | CbC              | CAU at SÚKL              | CAU (28/-)                          | 3y                        | -                 | -      | I, PaG, PrG  | SÚKL                     |
| Denmark        | DHMA                              | NAM, RM, OP                         | RS                           | M                       | CbC              | RC at DHMA or DACEHTA    | RC (7/4)                            | no                        | RC                | -      | I, DD, PaG   | DHMA                     |
| Estonia        | PC (MoSA)                         | NAM, RM<br>OP                       | RS (level) maximum price     | M                       | yes              | PC (EHIF/ SAM members)   | PC (8/-)                            | no                        | M, EHIF, patients | I, PC  | I, PaG       | MoSA                     |
| Finland        | PPB (MoSA)                        | NAM, RM<br>OP                       | RS maximum price             | M                       | yes              | PPB & KELA               | PPB (7/3)                           | 5y (3y new active subst.) | -                 | -      | I, DD, PaG   | PPB                      |
| France         | HAS                               | NAM, POM<br>OP, IP                  | RS (level) price negotiation | M or MoHSS              | CbC              | HAS staff                | CT at HAS (26/3)                    | 5y                        | MoHSS             | I      | I, MB        | MoHSS                    |
| Germany        | G-BA                              | NAM, POM<br>OP, IP                  | RS price negotiation         | M                       | CbC              | IQWiG and/or G-BA        | G-BA (13/4)                         | no                        | G-BA, M           | -      | PaG, quality | G-BA                     |

**Legend:** CbC = case by case; DD = duration of disease; I = indication; IP = inpatient; M = manufacturer; MB = Medical Benefit; NAM = newly authorized medicines; OP = outpatient; PaG = patient group; PC = price change; POM = prescription-only medicine; PrG = professional group; RM = reimbursed medicines; RS = reimbursement status; y = years; “-”= no information found.  
**Institutional abbreviations:** CAU - Price and Reimbursement Regulation; CT - Transparency Committee; DACEHTA - Danish Centre for Health Technology Assessment; DHMA - Danish Health and Medicines Authority; EHIF - Estonian Health Insurance Fund; G-BA - Federal Joint Committee; HAS - French National Authority for Health; IQWiG - Institute for Quality and Efficiency in Health Care; KELA - Social Insurance Institution; MoHSS – Ministry of Health and Social Security; MoSA - Ministry of Social Affairs; PC –Pharmaceuticals Committee; PPB - Pharmaceuticals Pricing Board; RC –Reimbursement Committee; SAM –State Agency of Medicines; SÚKL - State Institute for Drug Control.

Table 1 Overview of evidence-based decision-making processes for pharmaceutical coverage in 36 countries (cont.)

| Country | Institution in charge of coverage | Remit              | Purpose of appraising value     | Initial evidence report |                  | Evidence assessment team | Appraisal Committee (members, term) | Reassessment |           |        | Restrictions        | Final political decision |
|---------|-----------------------------------|--------------------|---------------------------------|-------------------------|------------------|--------------------------|-------------------------------------|--------------|-----------|--------|---------------------|--------------------------|
|         |                                   |                    |                                 | Producer                | Costs considered |                          |                                     | Regular      | Ad hoc    |        |                     |                          |
|         |                                   |                    |                                 |                         |                  |                          |                                     |              | Initiator | Reason |                     |                          |
| Greece  | MoH/EOF                           | NAM, POM<br>OP     | RS (level)<br>PR classification | none                    | -                | none                     | EOF                                 | -            | -         | -      | -                   | MoH                      |
| Hungary | NHIFA                             | NAM, POM<br>OP, IP | RS maximum price                | M                       | yes              | GYEMSZ I                 | TAC at NHIFA (8/-)                  | no           | M         | PC     | I, PaG              | NHIFA                    |
| Iceland | MoW                               | NAM, RM, POM<br>OP | RS maximum price                | M                       | yes              | LGN at MoW               | LGN (5+/4)                          | -            | -         | -      | I, PaG              | LGN at MoW               |
| Ireland | HSE                               | NAM<br>OP, IP      | RS (level)                      | M                       | yes              | NCPE                     | CPU at HSE (-/-)                    | -            | -         | -      | I, DD               | CPU at HSE               |
| Italy   | AIFA                              | NAM<br>OP, IP      | RS maximum price                | M                       | CbC              | CTS at AIFA              | CPR at AIFA (10/-)                  | -            | AIFA, M   | I, PC  | I, DD, PS, PaG, PrG | AIFA                     |

**Legend:** CbC = case by case; DD = duration of disease; I = indication; IP = inpatient; M = manufacturer; NAM = newly authorized medicines; OP = outpatient; PaG = patient group; PC = price change; POM = prescription-only medicine; PR = price referencing; PrG = professional group; PS = product-specific; RM = reimbursed medicines; RS = reimbursement status; TP = treatment programme; “-” = no information found. **Institutional abbreviations:** AIFA - Italian Medicines Agency; CPR - Pricing and Reimbursement Committee; CPU - Corporate Pharmaceutical Unit; CTS - Technical and Scientific Commission; EOF – National Organization for Medicines; GYEMSZI - National Institute for Quality- and Organizational Development in Healthcare and Medicines; HSE - Health Service Executive; LGN - Icelandic Medicine Pricing and Reimbursement Committee; MoH – Ministry of Health; MoW - Ministry of Welfare; NCPE - National Centre for Pharmacoeconomics; NHIFA - National Health Insurance Fund Administration; TAC - Technology Appraisal Committee.

Table 1 Overview of evidence-based decision-making processes for pharmaceutical coverage in 36 countries (cont.)

| Country       | Institution in charge of coverage | Remit             | Purpose of appraising value | Initial evidence report |                  | Evidence assessment team | Appraisal Committee (members, term)     | Reassessment |               |          | Restrictions       | Final political decision |
|---------------|-----------------------------------|-------------------|-----------------------------|-------------------------|------------------|--------------------------|-----------------------------------------|--------------|---------------|----------|--------------------|--------------------------|
|               |                                   |                   |                             | Producer                | Costs considered |                          |                                         | Regular      | Ad hoc        |          |                    |                          |
|               |                                   |                   |                             |                         |                  |                          |                                         |              | Initiator     | Reason   |                    |                          |
| Latvia        | NHS                               | NAM<br>OP, IP     | RS (level)<br>maximum price | M                       | yes              | NHS staff                | RMMED at NHS (-/-)                      | 2y (appr.)   | NHS, M        | PC       | I                  | NHS                      |
| Liechtenstein | HSC (adopts Swiss decisions)      | see Switzerland   |                             |                         |                  |                          |                                         |              |               |          | Government         |                          |
| Lithuania     | SAM (MoH)                         | NAM, POM<br>OP    | RS maximum price            | M                       | yes              | PhD at MoH               | SAM (14/-)                              | 5y           | -             | -        | I, DD, PaG, PrG    | MoH                      |
| Luxembourg    | MoH                               | NAM<br>OP, IP     | RS (level)<br>maximum price | -                       | yes              | CMSS at MoH              | CMSS at MoH                             | -            | -             | -        | prescription-based | MoH                      |
| Macedonia     | MoH                               | NAM, POM<br>OP,IP | RS                          | M                       | yes              | ad hoc groups at MoH     | ad hoc expert commissions at MoH (17/1) | no           | M, MoH<br>HIF | E, I, PC | I, DD, PrG, PS     | MoH                      |

**Legend:** DD = duration of disease; I = indication; IP = inpatient; M = manufacturer; NAM = newly authorized medicines; OP = outpatient; PaG = patient group; PC = price change; POM = prescription-only medicine; PrG = professional group; PS = product-specific; RS = reimbursement status; TP = treatment programme; y = years; “-”= no information found. **Institutional abbreviations:** CMSS – Pharmaceutical Reimbursement Commission; HIF – Health Insurance Fund; HSC – Health Services Commission; MoH - Ministry of Health; NHS - National Health Service; PhD - Department of Pharmacy; RMMED - Reimbursable medicines and medical equipment division; SAM –Positive Drug List Committee.

Table 1 Overview of evidence-based decision-making processes for pharmaceutical coverage in 36 countries (cont.)

| Country         | Institution in charge of coverage | Remit                     | Purpose of appraising value | Initial evidence report |                  | Evidence assessment team | Appraisal Committee (members, term) | Reassessment |           |        | Restrictions | Final political decision |
|-----------------|-----------------------------------|---------------------------|-----------------------------|-------------------------|------------------|--------------------------|-------------------------------------|--------------|-----------|--------|--------------|--------------------------|
|                 |                                   |                           |                             | Producer                | Costs considered |                          |                                     | Regular      | Ad hoc    |        |              |                          |
|                 |                                   |                           |                             |                         |                  |                          |                                     |              | Initiator | Reason |              |                          |
| Malta           | GFLAC                             | NAM, RM<br>OP, IP         | RS<br>maximum price         | M                       | CbC              | DPA at MoH               | GFLAC (9/2)                         | no           | M         | -      | PrG          | SPH                      |
| Montenegro      | FZZO                              | NAM, RM, POM<br>OP, IP    | RS                          | M                       | CbC              | PC at FZZO               | FZZO Board (13/4)                   | no           | MoH, M    | I      | -            | Board of FZZO            |
| The Netherlands | ZIN                               | NAM<br>OP, IP (high cost) | RS (level)                  | M                       | CbC              | ZIN staff                | ZIN Board (3/8)                     | 4y           | M, OS     | I      | I, MB, PaG   | MoHWS                    |
| Norway          | NoMA                              | NAM, POM<br>OP            | RS                          | M                       | yes              | DoP at NoMA              | NoMA (unclear)                      | -            | -         | -      | DD           | NoMA                     |
| Poland          | MoH                               | NAM<br>OP, IP             | RS                          | M                       | CbC              | AOTM                     | MoH (-/-)                           | -            | M, OS     | -      | I, PaG       | MoH                      |
| Portugal        | INFARMED                          | NAM<br>OP, IP             | RS                          | M                       | CbC              | INFARMED staff           | INFARMED Committee (45/3)           | 3y           | -         | -      | PS, PaG      | MoH (OP)                 |

**Legend:** CbC = case by case; DD = duration of disease; I = indication; IP = inpatient; M = manufacturer; NAM = newly authorized medicines; OP = outpatient; OS= other stakeholders; PaG = patient group; PC = price change; POM = prescription-only medicine; PrG = professional group; RM = reimbursed medicines; RS = reimbursement status; “-”= no information found. **Institutional abbreviations:** AOTM - Agency for Health Technology Assessment in Poland; CFH - Commission for pharmaceutical help; DoP – Department of Pharmacoeconomics; DPA - Directorate of Pharmaceutical Affairs; FZZO – Health Insurance Fund; GFLAC - Government Formulary List Advisory Committee; INFARMED - National Authority of Medicines and Health Products; MoH - Ministry of Health; MoHWS - Ministry of Health, Welfare and Sport; NoMA – Norwegian Medicines Agency; PC –Pharmaceutical Commission; SPH - Superintendent for Public Health; CVZ - Medicinal Products Reimbursement Committee of the Dutch Healthcare Insurance Board; ZIN – National Health Care Institute.

Table 1 Overview of evidence-based decision-making processes for pharmaceutical coverage in 36 countries (cont.)

| Country  | Institution in charge of coverage    | Remit                          | Purpose of appraising value  | Initial evidence report |                  | Evidence assessment team | Appraisal Committee (members, term) | Reassessment       |           |        | Restrictions    | Final political decision |
|----------|--------------------------------------|--------------------------------|------------------------------|-------------------------|------------------|--------------------------|-------------------------------------|--------------------|-----------|--------|-----------------|--------------------------|
|          |                                      |                                |                              | Producer                | Costs considered |                          |                                     | Regular            | Ad hoc    |        |                 |                          |
|          |                                      |                                |                              |                         |                  |                          |                                     |                    | Initiator | Reason |                 |                          |
| Romania  | MoPH                                 | NAM, RM<br>OP                  | RS (level)                   | M                       | CbC              | AMMD                     | TC at MoPH (4/-)                    | quarterly (prices) | -         | -      | I, PS, PrG, DD  | MoPH                     |
| Serbia   | RFZO                                 | NAM, RM, POM<br>OP, IP         | RS maximum price             | M                       | yes              | RFZO staff               | CSK at RFZO (7/-)                   | no                 | MoH, CSK  | I, PC  | I, PaG, PS, PrG | MoH                      |
| Slovakia | MoH                                  | NAM, POM<br>OP                 | RS                           | M & MoH staff           | yes              | CCM at MoH               | CCM (10/-)                          | quarterly (RS)     | -         | -      | I, DD           | MoH                      |
| Slovenia | ZZZS                                 | NAM, POM<br>OP, IP (high cost) | RS (level) price negotiation | M, ZZZS                 | yes              | DC at ZZZS               | DC (16/4)                           | no                 | ZZZS, M   | E, I   | I, DD, PaG, PrG | ZZZS                     |
| Spain    | IPC (pricing) & DGCF (reimbursement) | NAM, RM<br>OP, IP              | RS maximum price             | M & DGCF                | yes              | DGCF/IPC                 | DGCF/IPC (-/-)                      | max. 3y            | -         | -      | PS              | DGCF                     |

**Legend:** CbC = case by case; DD = duration of disease; E = evidence; I = indication; IP = inpatient; M = manufacturer; NAM = newly authorized medicines; OP = outpatient; PaG = patient group; PC = price change; POM = prescription-only medicine; PrG = professional group; PS = product-specific; RM = reimbursed medicines; RS = reimbursement status; y = years; “-”= no information found. **Institutional abbreviations:** AMMD – Romanian National Agency for Medicines and Medical Devices; CCM - Categorisation Commission for Medicines; CSK – Central Expert Committee for Medicines; DC - Drugs Committee; DGCF - Directorate General for Basic Services Portfolio and Pharmacy; IPC - Inter-Ministerial Pricing Commission; MoH - Ministry of Health; MoPH - Ministry of Public Health; RFZO – Republic Fund for Health insurance; TC – Transparency Committee; ZZZS - Health Insurance Institute of Slovenia

Table 1 Overview of evidence-based decision-making processes for pharmaceutical coverage in 36 countries (cont.)

| Country              | Institution in charge of coverage | Remit              | Purpose of appraising value                         | Initial evidence report |                  | Evidence assessment team           | Appraisal Committee (members, term) | Reassessment   |           |        | Restrictions    | Final political decision |
|----------------------|-----------------------------------|--------------------|-----------------------------------------------------|-------------------------|------------------|------------------------------------|-------------------------------------|----------------|-----------|--------|-----------------|--------------------------|
|                      |                                   |                    |                                                     | Producer                | Costs considered |                                    |                                     | Regular        | Ad hoc    |        |                 |                          |
|                      |                                   |                    |                                                     |                         |                  |                                    |                                     |                | Initiator | Reason |                 |                          |
| Sweden               | TLV                               | NAM, RM, POM<br>OP | RS<br>maximum price                                 | M & TLV                 | yes              | PBB at TLV                         | PBB (7/-)                           | Yes (variable) | TLV, M    | -      | PS, PaG         | PPB at TLV               |
| Switzerland          | BAG                               | NAM, RM<br>OP, IP  | RS<br>maximum price                                 | M                       | yes              | EAK at BAG                         | EAK (16/-)                          | -              | -         | -      | I, supply       | BAG                      |
| Turkey               | SGK                               | NAM<br>OP, IP      | RS (level)<br>PR<br>classification<br>maximum price | M                       | -                | MEAC* at SGK                       | ÖK* at SGK (10/-)                   | -              | -         | -      | -               | ÖK*                      |
| UK - England & Wales | NICE                              | NAM, RM<br>OP, IP  | RS                                                  | M & NICE/others         | yes              | NICE staff and/or external centres | AC at NICE (var.)                   | 1-3y           | -         | -      | I, PaG, PrG, TP | NHS                      |
| UK - Scotland        | SMC                               | NAM, POM<br>OP, IP | RS                                                  | M                       | yes              | SMC staff                          | NDC at SMC                          | no             | AD&TC     | E      | I, PaG, PrG, TP | AD&TC (NHSS)             |

**Legend:** E = evidence; I = indication; IP = inpatient; M = manufacturer; NAM = newly authorized medicines; OP = outpatient; OS= other stakeholders; PaG = patient group; POM = prescription-only medicine; PR = price referencing; PrG = professional group; PS = product-specific; RM = reimbursed medicines; RS = reimbursement status; TP = treatment programme; y = years; “-” = no information found. **Institutional abbreviations:** AC - Appraisal Committee; AD&TC - Area Drugs and Therapeutic Committee; BAG – Federal Office of Public Health; EAK – Federal Drug Commission; MEAC – Medical and Economic Evaluation Commission; NHS - National Health Service; NHSS - National Health Service Scotland; NICE - National Institute for Health and Care Excellence; SMC - Scottish Medicines Consortium; NDC - New Drugs Committee (Scotland); ÖK – Reimbursement Commission; PBB - Pharmaceutical Benefits Board; SGK – Social Security Institution; TLV - Dental and Pharmaceutical Benefits Agency // \*MEAC and ÖK comprise members from the Social Security Institution, the General Directorate of Pharmaceuticals and Pharmacy and the Ministry of Finance.
